# Supplementary material for: Synthesis and photochemistry of free base and zinc tetraaryl porphyrins mono-substituted with tungsten pentacarbonyl via a pyridine linker
Source: Royal Society of Chemistry journal article supplement (doi:10.1039/b108562j), 2002-01-01
Supplement: b108562j.doc [file b108562j.doc]

**Synthesis and photochemistry of free base and zinc tetraaryl porphyrins mono-substituted with tungsten pentacarbonyl *via* a pyridine linker**

# Catherine J. Aspley, John R. Lindsay Smith, Robin N. Perutz and Daniel Pursche

### Supplementary Information (7 Pages)

## Derivation of Equation 4 from Equation 3

Equation 3 may be rewritten as an integral:

Substituting x for [A*] and a and b for k1 and 2k2 respectively gives

The solution to this differential equation is given in the literature as follows:

Integration from time 0 to time t and from x0 to xt can be expressed as:

Thus

The solution of Equation v can be rearranged to give Equation vi as follows:

Substituting [A*] for x and k1 and 2k2 for a and b gives equation vii which can be simplified by dividing all through by [A*]0 to give equation 4.

## Calculations of free energy of electron transfer

The photoproducts of W(CO)5**3b** and W(CO)5**4b** may be formed by photoinduced electron transfer. If the tungsten fragment is oxidised and undergoes metal-to-ligand charge transfer to the pyridyl porphyrin, the porphyrin could be reduced to a radical ion or to a dihydroporphyrin such as a chlorin. Note that Zn(tpc) (where TPC denotes tetraphenylchlorin) has emission bands at 625 [Q(0,0)] and 690 nm [Q(0,1)].[[1]](#endnote-2) The free energy of electron transfer, GeT, may be estimated using equation viii where E1/2ox and E1/2red are the potentials for oxidation of the donor and for reduction of the acceptor and Es0-0 is the energy of the excited state:[[2]](#endnote-3)

**GeT = E1/2ox  E1/2red  ES0,0 Equation viii**

**Electron transfer from tungsten to porphyrin.** For a series of W(CO)5(substituted pyridine) complexes, the irreversible tungsten-centred oxidation is at *ca.* 0.7 V *vs* the ferrocene/ferrocenium couple (Fc/Fc+) in CH2Cl2.[[3]](#endnote-4) The Fc/Fc+ couple has a potential of 0.46 V *vs* SCE in CH2Cl2.[[4]](#endnote-5) Thus E1/2ox is 1.16 V *vs* SCE, E1/2red is approximated by the value given for Zn(tpp) in CH2Cl2 of ‑1.35 V *vs* SCEError: Reference source not found and the energy of the MLCT state of emissive W(CO)5(pyridine) complexes is 19600 cm-1 or 2.43 eV.[[5]](#endnote-6) Using these values GeT is estimated to be +0.08 V for W(CO)5**3b** and W(CO)5**4b**. In addition, if the E1/2red value of H2tpp is used (1.19 V)Error: Reference source not found, GeT is found to be ‑0.08 V for the free base compounds W(CO)5**3a** and W(CO)5**4a**.

**Electron transfer from porphyrin to tungsten.** The data above suggest that the reaction is more favourable for free base porphyrins than zinc porphyrins, in contrast to the experimental observations. Therefore electron transfer in the opposite direction was considered. The potentials for oxidation of Zn(tpp) and H2tpp are 0.80 and 1.06 *vs* SCE in CH2Cl2.Error: Reference source not found The potential for reduction of the tungsten fragment is approximated to that of W(CO)5(4-CN-py), 1.20 V *vs* SCE in DMF [[6]](#endnote-7) and values of 2.07 and 1.91 V were used for the Es0-0 values of ZnTPP and H2TPP. In this way GeT was found to be ‑0.07 V for the zinc porphyrin and +0.35 V for the free base porphyrin.

**Additional spectroscopic data for porphyrin derivatives**

**5-[4-(Nicotinamidyl)phenyl]-10,15,20-Triphenyl-Porphyrin 3a**

UV/vis: max/nm (CH2Cl2)644 (Q1), 589 (Q2), 549 (Q3), 513 (Q4), 418 (Soret). Excitation max/nm (THF, em 650 nm): 648, 591, 548, 513, 482 (w) and 417 nm.1H NMR (500 MHz, CDCl3): ** 9.31 (1H, d, *J* 1.85 Hz, nicotinoyl), 8.88 (2H, d, *J* 4.75 , **-pyrrole), 8.86 (2H, d, *J* 4.75 , **-pyrrole), 8.85 (4H, s, **-pyrrole), 8.41 (1H, dt, *J* 7.9 Hz, *J* 1.85 Hz, nicotinoyl), 8.36 (1H, s, amide NH), 8.30 (2H, d, *J* 8.2 Hz, bridging phenyl), 8.26 (6H, m, *ortho*-phenyl), 8.10 (2H, d, *J* 8.2 Hz, bridging phenyl), 7.81 (9H, m, *meta-/para-*phenyl), 7.58 (1H, ddd, *J* 7.9 Hz, *J* 4.9 Hz, *J* 0.8 Hz, nicotinoyl), -2.72 (2H, s, pyrrole NH). 13C{1H} NMR (75 MHz, CDCl3, assigned using 1H-13C HMQC NMR 500 MHz):** 164.2 (CO), 152.7 (**-pyrrole), 148.0 (nicotinoyl at ** 9.31 in 1H NMR), 142.1, 138.9, 137.2, 135.4, 135.2 (nicotinoyl at ** 8.41 in 1H NMR), 134.5 (*ortho-*phenyl), 130.8 (**-pyrrole), 127.7 (*meta-/para-*phenyl), 126.7, 123.8 (nicotinoyl at ** 7.58 in 1H NMR), 120.2, 119.2 (bridging phenyl at ** 8.10), 118.6.

# Zinc 5-[4-(Nicotinamidyl)phenyl]-10,15,10-Triphenylporphyrin 3b

UV/vis: max/nm (pyridine, /dm3 mol-1 cm-1) 603 (Q1, 9 500) 562 (Q2, 16 000), 523 (Q3, 3 300), 430 (Soret, 480 000) and 409 (sh, 38 000). Emission max/nm (pyridine, ex 562 or 603 nm): 612 and 657 (uncorr.), 615 and 665 (corr.).Excitation max/nm (pyridine, em 615 nm, Q-band region only): 603, 563 and 524. Excitationmax/nm (THF) (with, em 655 nm, Q-band region only): 595, 555 and 516.

**5-[4-(Isonicotinamidyl)phenyl]-10,15,20-Triphenyl-Porphyrin 4a**

UV/vis: max/nm (CHCl3) 646 (Q1), 588 (Q2), 550 (Q3), 515 (Q4), 418 (Soret). 1H NMR (500 MHz, CDCl3): ** 8.94 (dd, *J* 4.3 Hz, *J* 1.6 Hz, isonicotinoyl) and 8.92 (d, *J* 6.8 Hz, **-pyrrole) total 10H, 8.29 (s, amide NH) and 8.26 (m, *ortho-*phenyl and two bridging phenyl), total 9H, 8.08 (2H, d, *J* 8.3 Hz, bridging phenyl), 7.90 (2H, dd, *J* 4.3 Hz, *J* 1.6 Hz, isonicotinoyl), 7.82 (9H, m, *meta-/para-*phenyl), -2.70 (2H, s, pyrrole NH). 13C{1H} NMR (75 MHz, CDCl3, assigned using DEPT 90125 MHzand 1H-13C COSY NMR 500 MHz):** 164.0 (CO), 151.0 (CH, isonicotinoyl at ** 8.94 in 1H NMR), 142.2 (C), 139.3 (C), 137.1 (C), 135.3 (CH, *ortho-* and/ or bridging phenyl) 134.7 (CH, *ortho-* and/ or bridging phenyl) *ca.* 131 (w, **-pyrrole), 127.9 (CH, *meta-/para-*phenyl) 126.8 (CH, *meta-/para-*phenyl) 121.0 (C) 120.9 (CH, isonicotinoyl at ** 7.90 in 1H NMR) 119.1 (C), 118.7 (CH, bridging phenyl at ** 8.08).

**Zinc 5-[4-(Isonicotinamidyl)phenyl]-10,15,20-Triphenylporphyrin 4b**

UV/vis: max/nm (pyridine)603 (Q1), 563 (Q2), 524 (Q3), 430 (Soret), 409 (sh). Emission (pyridine, ex 603 or 563 nm) max/nm: 611 and 654 (uncorr.). 1H NMR (300 MHz, [2H5]pyridine): ** 11.62 (1H, s, amide NH), 9.18 (2H, d, *J* 4.77 Hz, **-pyrrole), 9.09  9.05 (total 6H, d, *J* 4.77 Hz and s, **-pyrrole), 8.82 (2H, d, *J* 5.88 Hz , isonicotinoyl), 8.46 (2H, d, *J* 8.46 Hz, bridging phenyl), 8.35  8.28 (8H, m, two bridging phenyl and six *ortho-*phenyl), 8.10 (2H, d, *J* 5.88 Hz, isonicotinoyl), 7.67 (9H, m, *meta-/para-*phenyl). 13C{1H} NMR (75 MHz, [2H5]pyridine and DEPT 90 NMR67 MHz): **166.0 (amide CO), 151.3 (CH), 151.2 (C), 151.1 (C), 144.3 (C), 143.8 (C),140.2 (C), 139.7 (C), 139.3 (C), 136.0 (CH), 135.5 (CH), 132.8 (CH), 128.2 (CH), 127.3 (CH), 124.2 (CH), 122.7 (CH), 121.8 (C), 121.4 (C), 119.6 (CH). **C([2H8]THF, 75 MHz,assigned using DEPT 90 75 MHz and 1H-13CCOSY NMR 500 MHz) 166.0 (amide CO), 152.3 (C), 152.2 (C), 152.2 (CH, isonicotinoyl at ~ **8.43 in 1H NMR), 145.8 (C), 144.9 (C), 141.4 (C), 140.7 (C), 136.8 (CH, *ortho-* or bridging phenyl), 136.5 (CH, *ortho-* or bridging phenyl), 133.4 (CH, **-pyrrole), 129.3 (CH, *meta-/para-*phenyl), 128.3 (CH, *meta-/para-*phenyl), 123.2 (CH, isonicotinoyl at ~ **7.9 in 1H NMR), 122.7 (C), 122.3 (C), 119.9 (CH, *ortho-* or bridging phenyl).

a This resonance is observed between ** 8.55 and 8.36. b This resonance is observed between ** 7.94 and 7.85. The isonicotinoyl protons shift upfield as the concentration is increased, suggesting that even in a weakly-coordinating solvent such as THF the isonicotinoyl protons are in close proximity to another porphyrin molecule and experience the ring current of a neighbouring molecule. The upfield shift agrees with the literature trend for other pyridyl porphyrins undergoing self-assembly in non-coordinating solvents.[[7]](#endnote-8)

**W(CO)5(5-[4-(Nicotinamidyl)-phenyl]-10,15,20-Triphenylporphyrin) W(CO)53a**

Excitation (THF, em 652 nm) max/nm: 649, 591, 548, 513 and 418.13C{1H} NMR (75 MHz, [2H8]THF, assigned using DEPT 90 75 MHz and 1H- 13C COSY NMR 500 MHz): **203.6 (*trans* CO), 201.0 (*cis* CO), 164.4 (amide CO), 160.3 (CH, nicotinoyl at ** 9.32 in 1H NMR), 157.6 (CH, nicotinoyl at ** 9.69 in 1H NMR), 144.5 (C), 140.9 (C), 140.4 (C), 138.8 (CH, nicotinoyl at ** 8.66 in 1H NMR), 137.0 (CH, bridging or *ortho-*phenyl), 136.5 (CH, bridging or *ortho-*phenyl), 136.2 (C), 132.8 (br w, **-pyrrole), 129.8 (CH, *meta-/para-*phenyl), 128.8 (CH, *meta-/para-*phenyl), 127.6 (CH, nicotinoyl at 7.75 in 1H NMR), 122.2 (C), 121.7 (C), 120.4 (CH, bridging or *ortho-*phenyl).

**W(CO)5(Zinc 5-[4-(Nicotinamidyl)-phenyl]-10,15,20-Triphenylporphyrin) W(CO)53b**

Excitation (THF, em 605 nm, Q-band region only) max/nm: 595, 555, 516. 13C{1H} NMR (75 MHz, [2H8]THF, assigned using DEPT 90 75 MHz and 1H-13C COSY NMR 500 MHz): ** 203.7 (*trans* CO), 201.0 (*cis* CO), 164.4 (amide CO), 160.3 (CH, nicotinoyl at ** 9.29 in 1H NMR), 157.6 (CH, nicotinoyl at ** 9.68 in 1H NMR), 153.3 (C), 152.3 (C), 152.2 (C), 145.8 (C), 141.8 (C), 140.5 (C), 138.8 (CH, nicotinoyl at ** 8.62 in 1H NMR), 137.0 (CH, bridging phenyl or *ortho-*phenyl), 136.6 (CH, bridging phenyl or *ortho-*phenyl), 136.2 (C), 133.5 (CH, **-pyrrole), 133.3 (CH, **-pyrrole), 129.3 (CH, *meta-/para-*phenyl), 128.4 (CH, *meta-/para-*phenyl), 127.6 (CH, *meta-/para-*phenyl), 122.8 (C), 122.2 (C), 120.1 (CH, bridging phenyl or *ortho-*phenyl).

**W(CO)5(5-[4-(Isonicotinamidyl)-phenyl]-10,15,20-Triphenylporphyrin) W(CO)54a**

Excitation (THF, em 652 nm, Q-band region only) max/nm: 592, 548, 513, 417. Band at 647 nm too close to emission setting to be observed. 13C{1H} NMR** (75 MHz, [2H8]THF, assigned using DEPT 90 75 MHz and 1H-13C COSY NMR 500 MHz): **203.9 (*trans* CO), 201.0 (*cis* CO), 164.7 (amide CO), 159.2 (isonicotinoyl at ** 9.33 in 1H NMR), 152.6 (CH, w), 146.4 (C), 144.5 (C), 140.8 (C), 140.6 (C), 137.0 (*ortho-*phenyl or bridging phenyl), 136.5 (*ortho-*phenyl or bridging phenyl), 132 (br w, **-pyrrole), 129.8 (CH, *meta-/para-*phenyl), 128.8 (*meta-/para-*phenyl), 125.7 (isonicotinoyl at ** 8.08 in 1H NMR), 122.2 (C), 121.7 (C), 120.4 (*ortho-*phenyl or bridging phenyl).

**W(CO)5(Zinc 5-[4-Isoicotinamidyl)phenyl]-10,15,20-Triphenylporphyrin) W(CO)54b**

Excitation(THF, em 655 nm, Q-band region only) max/nm: 594, 555, 513. 13C{1H} NMR**(75 MHz, [2H8]THF, assigned using DEPT 90, 75 MHz and 1H-13C COSY NMR, 500 MHz) **203.9 (*trans* CO), 200.9 (*cis* CO), 164.6 (amide CO), 159.2 (CH, isonicotinoyl at ** 9.37 in 1H NMR), 152.2 (C), 146.4 (C), 145.8 (C), 141.9 (C), 140.4 (C), 136.9 (*ortho-*phenyl or bridging phenyl), 136.6 (*ortho-*phenyl or bridging phenyl), 133.4 (**-pyrrole), 133.3 (**-pyrrole), 129.3 (CH, *meta-/para-*phenyl), 128.4 (CH, *meta-/para-*phenyl), 125.7 (CH, isonicotinoyl at ** 8.13 in 1H NMR), 122.7 (C), 122.1 (C), 120.0 (*ortho-*phenyl or bridging phenyl).

1. . Ed. D. Dolphin, *“The Porphyrins”*, Vol. 3, Physical Chemistry, Part A, Academic Press, 1978, Chapter 1. [↑](#endnote-ref-2)
2. . M. Sirish and B. G. Maiya, *J. Photochem. Photobiol. A: Chem.*, 1994, **77**, 189. [↑](#endnote-ref-3)
3. . S. Sakanishi, D. A. Bardwell, S. Couchman, J. C. Jeffery, J. A. McCleverty and M. D. Ward, *J. Organomet. Chem.*, 1997, **528**, 35. [↑](#endnote-ref-4)
4. . N. G. Connelly and W. E. Geiger, *Chem. Rev.*, 1996, **96**, 877. [↑](#endnote-ref-5)
5. . A. J. Lees and A. W. Adamson, *J. Am. Chem. Soc.*, 1982, **104**, 3804. [↑](#endnote-ref-6)
6. . W. Kaim, *Inorg. Chem.*, 1984, **23**, 504. [↑](#endnote-ref-7)
7. (a) C. A. Hunter and L. D. Sarson, *Angew. Chem. Int. Ed. Engl.*, 1994, **33**, 2313. (b) X. Chi, A. J. Guerin, R. A. Haycock, C. A. Hunter and L. D. Sarson, *J. Chem. Soc., Chem. Commun.*, 1995, 2567. [↑](#endnote-ref-8)
